# Supplementary material for: Transcriptional Abnormalities of Hamstring Muscle Contractures in Children with Cerebral Palsy
Source: PLoS One. 2012 Aug 16;7(8):e40686. doi: 10.1371/journal.pone.0040686 (PMC3431909; doi:10.1371/journal.pone.0040686)
Supplement: Table S3 — List of gene families and complexes used for Figure 3 . Complexes are separated by the functional muscle network. (XLSX) [file pone.0040686.s003.xlsx]

## Sheet: Sup Table 3
Complex	Entrez IDs	Entrez Symbols
Neuromuscular Junction
CHRN	1134;1140;1144;1145	CHRNA1;CHRNB1;CHRND;CHRNE
COL4	1285;1286;1287;1288	COL4A3;COL4A4;COL4A5;COL4A6
GABP	2551;2553	GABPA;GABPB1
ERBB	2064;2066	ERBB2;ERBB4
Excitation Contraction Coupling
CACN	779; 781; 782; 786	CACNA1S; CACNA2D1; CACNB1; CACNG1
CASQ	844; 845	CASQ1; CASQ2
ATP2A1	487; 488; 489	ATP2A1; ATP2A2; ATP2A3
CAMK2	815;816;817;818	CAMK2A;CAMK2B;CAMK2D;CAMK2G
CAPN	823;824;825	CAPN1;CAPN2;CAPN3
TRPC	7220; 7725	TRPC1;TRPC6
Muscle Contraction
MYH	4619;4620;4625	MYH1;MYH2;MYH7
MYL	4632;4633;4634	MYL1;MYL2;MYL3
MYBPC	4605;4606	MYBPC1;MYBPC2
MYOM	8736;8737	MYOM1; MYOM2
ACTA	58;59;70	ACTA1; ACTA2; ACTC1
ACTN	88;89	ACTN2;ACTN3
CAPZ	829;830;832	CAPZA1;CAPZA2;CAPZB
TMOD	7111;29765	TMOD1;TMOD4
TNNT	7138;7140	TNNT1; TNNT3
TNNI	7135;7136	TNNI1; TNNI2
TNNC	7134;7135	TNNC1; TNNC2
TPM	7168;7169;7170	TPM1;TPM2;TPM3
Cytoskeleton
SGC	6442;6443;6444;6445	SGCA; SGCB;SGCD;SGCG
SNT	6640;6641;6645;54212;54221	SNTA1;SNTB1;SNTB2;SNTG1;SNTG2
DTN	1837;1838	DTNA;DTNB
SPT	6708;6710	SPTA1;SPTB
ANK	286;287	ANK1;ANK2
Extracellular Matrix
COL1	1277;1278	COL1A1;COL1A2
COL4	1282;1284	COL4A1;COL4A2
COL6	1291;1292;1293	COL6A1;COL6A2;COL6A3
LAM	3908;3912;3913;3915	LAMA2;LAMB1;LAMB2;LAMC1
P4H	5033;5034	P4HA1;P4HB
SDC	6383;6385	SDC2;SDC4
Energy Metabolism
NDUF	4694;4695;4696;4697;4698;4700;4701;4702;4704;4707;4708;4709;4711;4712;4713;4717;4718;4719;4720;4722;4724;4725;4726;374291;4728;4723;4729	NDUFA1;NDUFA2;NDUFA3;NDUFA4;NDUFA5;NDUFA6;NDUFA7;NDUFA8;NDUFA9;NDUFB1;NDUFB2;NDUFB3;NDUFB5;NDUFB6;NDUFB7;NDUFC1;NDUFC2;NDUFS1;NDUFS2;NDUFS3;NDUFS4;NDUFS5;NDUFS6;NDUFS7;NDUFS8;NDUFV1;NDUFV2
SDH	6389;6390;6391;6392	SDHA;SDHB;SDHC;SDHD
CYC	1537;7386;7384;7385;7388;7381;27089	CYC1;UQCRFS1;UQCRC1;UQCRC2;UQCRH;UQCRB;UQCRQ
COX	1352;9377;1329;1339;1340;1346;1349;1350;1351;1353;1355;10063	COX10;COX5A;COX5B;COX6A2;COX6B1;COX7A1;COX7B;COX7C;COX8A;COX11;COX15;COX17
ATP5	498;506;509;513;514;515;518;10476;521;522;9551;10632;539;27109	ATP5A1;ATP5B;ATP5C1;ATP5D;ATP5E;ATP5F1;ATP5G3;ATP5H;ATP5I;ATP5J;ATP5J2;ATP5L;ATP5O;ATP5S
AMPK	5563;5565;53632	PRKAA2;PRKAB2;PRKAG3
TFB	51106;64216	TFB1M;TFB2M
MEF2	4205;4208;4209	MEF2A;MEF2C;MEF2D
CAMK2	815;816;817;818	CAMK2A;CAMK2B;CAMK2D;CAMK2G
PDH	5160;5162	PDHA1;PDHB
Muscle Hypertrophy and Atrophy
MAPK1/3	5594; 5595	MAPK1; MAPK3
FOXO	2308; 2309	FOXO1; FOXO3
MAP2K	5604; 5605	MAP2K1; MAP2K2
CAMK2	815;816;817;818	CAMK2A;CAMK2B;CAMK2D;CAMK2G
MEF2	4205;4208;4209	MEF2A;MEF2C;MEF2D
HDAC	9759;10019;51564;9734	HDAC4;HDAC5;HDAC7;HDAC9
PIK3R	5295; 5296; 8503	PIK3R1; PIK3R2; PIK3R3
