# Supplementary material for: Transcriptional Abnormalities of Hamstring Muscle Contractures in Children with Cerebral Palsy
Source: PLoS One. 2012 Aug 16;7(8):e40686. doi: 10.1371/journal.pone.0040686 (PMC3431909; doi:10.1371/journal.pone.0040686)
Supplement: Table S4 — Genes significantly correlated with passive stiffness measurements on fibers and fiber bundles. (XLSX) [file pone.0040686.s004.xlsx]

## Sheet: Sup Table 4
Entrez Gene	Gene Symbol	R-value	p-value
Positive Correlation with Bundle Stiffness
3588	IL10RB	0.691925	5.82806e-06
5910	RAP1GDS1	0.600589	0.000173072
81578	COL21A1	0.593074	0.000218668
57473	ZNF512B	0.573158	0.000395517
4332	MNDA	0.569202	0.000442951
114882	OSBPL8	0.556933	0.000623777
29982	NRBF2	0.543516	0.000893663
9858	KIAA0649	0.540436	0.000968516
3959	LGALS3BP	0.521214	0.00157331
9200	PTPLA	0.516961	0.00174499
6746	SSR2	0.512701	0.00193315
26053	AUTS2	0.507788	0.00217193
64285	RHBDF1	0.50508	0.00231425
5361	PLXNA1	0.500851	0.00255275
55680	RUFY2	0.496637	0.00281139
7005	TEAD3	0.495456	0.00288785
7076	TIMP1	0.47924	0.00413539
9168	TMSB10	0.47549	0.00448249
10769	PLK2	0.474112	0.00461624
6659	SOX4	0.472197	0.00480784
716	C1S	0.469204	0.00512091
10092	ARPC5	0.459516	0.00625745
9411	ARHGAP29	0.458755	0.00635527
4017	LOXL2///ENTPD4	0.458559	0.00638061
80032	ZNF556	0.45826	0.00641957
1573	CYP2J2	0.457459	0.0065248
1277	COL1A1	0.456956	0.0065917
29980	DONSON	0.456405	0.00666555
871	SERPINH1	0.455859	0.00673946
84196	USP48	0.45461	0.00691116
23645	PPP1R15A	0.454112	0.00698062
8560	DEGS1	0.453961	0.00700188
2673	GFPT1	0.449982	0.00758044
10971	YWHAQ	0.449626	0.00763421
9590	AKAP12	0.446451	0.00812767
1282	COL4A1	0.44416	0.00850033
827	CAPN6	0.441787	0.00890166
894	CCND2	0.435318	0.0100783
5627	PROS1	0.435075	0.0101248
1284	COL4A2	0.434388	0.0102578
6347	CCL2	0.433344	0.0104626
4907	NT5E	0.432076	0.0107158
7837	PXDN	0.431095	0.0109154
3912	LAMB1	0.427297	0.0117179
1278	COL1A2	0.426953	0.0117929
5328	PLAU	0.424962	0.0122355
399687	TIAF1///MYO18A	0.424056	0.0124414
7373	COL14A1	0.423119	0.0126576
8836	GGH	0.422133	0.0128884
2205	FCER1A	0.421566	0.0130226
57538	ALPK3	0.419386	0.0135501
5422	POLA1	0.417149	0.0141098
22795	NID2	0.4162	0.0143531
23387	KIAA0999	0.415254	0.0145991
57188	ADAMTSL3	0.414817	0.014714
7043	TGFB3	0.413999	0.0149309
50854	C6orf48	0.412179	0.0154233
8527	DGKD	0.411646	0.0155703
55450	CAMK2N1	0.40844	0.0164777
4060	LUM	0.406823	0.0169521
51596	CUTA	0.406359	0.0170903
65108	MARCKSL1	0.403851	0.0178535
1809	DPYSL3	0.402147	0.0183881
8910	SGCE	0.401615	0.0185581
9948	WDR1	0.401289	0.0186625
6122	RPL3	0.399063	0.0193898
30851	TAX1BP3	0.398625	0.0195358
3791	KDR	0.398311	0.0196408
55384	MEG3	0.398173	0.0196873
81603	TRIM8	0.396722	0.0201801
10763	NES	0.396457	0.0202712
81855	SFXN3	0.396066	0.0204063
51330	TNFRSF12A	0.39577	0.020509
6868	ADAM17	0.393997	0.0211335
65982	ZSCAN18	0.39376	0.021218
5358	PLS3	0.392508	0.0216699
4811	NID1	0.391578	0.0220106
6645	SNTB2	0.391401	0.0220763
5725	PTBP1	0.390089	0.0225657
5479	PPIB	0.389776	0.0226839
1289	COL5A1	0.389704	0.0227109
4478	MSN	0.389482	0.022795
51604	PIGT	0.389025	0.022969
5142	PDE4B	0.388379	0.023217
22834	ZNF652	0.385558	0.0243259
7056	THBD	0.385319	0.0244215
4969	OGN	0.385001	0.0245498
60	ACTB	0.384347	0.0248149
754	PTTG1IP	0.383821	0.0250298
1290	COL5A2	0.383504	0.0251603
221749	C6orf145	0.383082	0.0253343
8406	SRPX	0.382505	0.0255742
23643	LY96	0.381846	0.0258506
51778	MYOZ2	0.379806	0.0267219
1292	COL6A2	0.379074	0.02704
10234	LRRC17	0.378363	0.0273525
9770	RASSF2	0.377564	0.0277067
3339	HSPG2	0.376557	0.0281588
9208	LRRFIP1	0.376279	0.0282846
4637	MYL6///MYL6B	0.376118	0.0283578
140465	MYL6///MYL6B	0.376118	0.0283578
3717	JAK2	0.375862	0.0284741
9941	EXOG	0.375653	0.0285696
22918	CD93	0.375252	0.0287534
1192	CLIC1	0.373851	0.0294034
55603	FAM46A	0.372813	0.0298927
57644	MYH7B	0.372631	0.029979
9397	NMT2	0.372625	0.0299822
1281	COL3A1	0.372395	0.0300914
51303	FKBP11	0.371337	0.0305996
25878	MXRA5	0.369584	0.0314574
1396	CRIP1	0.369248	0.0316241
8974	P4HA2	0.367195	0.0326574
79673	ZNF329	0.365984	0.0332801
9936	CD302	0.364012	0.0343141
9865	KIAA0644	0.361896	0.0354528
23768	FLRT2	0.361051	0.0359165
7534	YWHAZ	0.360825	0.0360406
9871	SEC24D	0.360361	0.0362979
5720	PSME1	0.359856	0.0365799
6431	SFRS6	0.357666	0.0378214
23462	HEY1	0.357596	0.0378615
81035	COLEC12	0.357493	0.0379211
80781	COL18A1	0.357311	0.0380261
71	ACTG1	0.357157	0.0381146
51474	LIMA1	0.356449	0.0385261
5607	MAP2K5	0.355065	0.0393405
1857	DVL3	0.354272	0.0398131
4223	MEOX2	0.353537	0.0402554
11031	RAB31	0.353177	0.0404736
9125	RQCD1	0.352815	0.0406934
10627	MRCL3///MRLC2	0.351452	0.0415314
2017	CTTN	0.350381	0.0421994
206358	SLC36A1	0.350233	0.0422925
2817	GPC1	0.3496	0.0426922
3684	ITGAM	0.349052	0.0430405
25903	OLFML2B	0.348405	0.0434547
55743	CHFR	0.348074	0.0436684
3838	LOC728860///KPNA2	0.345635	0.0452653
7805	LAPTM5	0.344123	0.0462784
7846	TUBA1A	0.341966	0.0477557
Negative Correlation with Bundle Stiffness
26505	CNNM3	-0.511937	0.00196867
8028	MLLT10	-0.50932	0.00209487
27252	KLHL20	-0.503768	0.00238608
395	ARHGAP6	-0.50376	0.00238652
54812	AFTPH	-0.498628	0.00268648
9255	SCYE1	-0.497747	0.00274119
3227	HOXC11	-0.492514	0.0030862
10914	PAPOLA	-0.488252	0.0033945
30968	STOML2	-0.468649	0.00518085
51619	UBE2D4	-0.466934	0.00536984
1831	TSC22D3	-0.46048	0.00613546
9412	MED21	-0.459907	0.00620778
5207	PFKFB1	-0.458562	0.00638032
2875	GPT	-0.454238	0.00696305
163	AP2B1	-0.452458	0.00721588
1432	MAPK14	-0.452063	0.00727304
90411	MCFD2	-0.447549	0.00795392
79177	ZNF576	-0.446931	0.00805133
11212	PROSC	-0.443247	0.00865279
204	AK2	-0.437271	0.00970992
6643	SNX2	-0.424333	0.0123781
32	ACACB	-0.423998	0.0124547
57192	MCOLN1	-0.423827	0.012494
1286	COL4A4	-0.423268	0.012623
5260	PHKG1	-0.421143	0.0131235
3613	IMPA2	-0.420525	0.0132723
653390	RRN3///LOC653390///LOC730092	-0.41994	0.0134143
730092	RRN3///LOC653390///LOC730092	-0.41994	0.0134143
9131	AIFM1	-0.414905	0.0146909
327	APEH	-0.41022	0.0159684
51118	UTP11L	-0.409347	0.0162167
8996	NOL3	-0.407011	0.0168965
4351	MPI	-0.406546	0.0170346
1353	COX11	-0.4059	0.0172279
9652	TTC37	-0.40069	0.0188561
29780	PARVB	-0.398325	0.0196361
10598	AHSA1	-0.397527	0.0199054
5439	POLR2J3///POLR2J2///POLR2J4///LOC100134053///POLR2J	-0.392934	0.0215155
22875	ENPP4	-0.392166	0.0217948
310	ANXA7	-0.392139	0.0218045
1052	CEBPD	-0.387682	0.0234871
11098	PRSS23	-0.38315	0.0253063
10197	PSME3	-0.383113	0.0253216
1737	DLAT	-0.383049	0.0253482
6048	RNF5	-0.382543	0.0255583
8504	PEX3	-0.382195	0.0257039
8604	SLC25A12	-0.381458	0.0260144
54469	ZFAND6	-0.38081	0.0262901
3694	ITGB6	-0.379757	0.026743
9682	JMJD2A	-0.379508	0.0268509
3790	KCNS3	-0.379435	0.0268828
9443	MED7	-0.376541	0.0281659
1104	SNHG3-RCC1///RCC1	-0.373562	0.0295392
80067	C2orf37	-0.373383	0.0296233
51377	UCHL5	-0.372255	0.0301585
11043	MID2	-0.371411	0.0305641
5170	PDPK1	-0.370935	0.0307945
10063	COX17	-0.370147	0.0311795
55696	RBM22	-0.370049	0.0312279
114876	OSBPL1A	-0.368029	0.0322342
10241	CALCOCO2	-0.36792	0.0322891
7879	RAB7A	-0.367725	0.032388
5481	PPID	-0.367578	0.0324625
9457	FHL5	-0.367524	0.0324897
51575	ESF1	-0.36724	0.0326347
10490	VTI1B	-0.366532	0.0329972
25788	LOC100128414///RAD54B	-0.366325	0.0331039
100128414	LOC100128414///RAD54B	-0.366325	0.0331039
23283	CSTF2T	-0.365854	0.0333474
2995	GYPC	-0.36459	0.0340082
4338	MOCS2	-0.362451	0.0351512
84942	WDR73	-0.359734	0.0366478
687	KLF9	-0.35944	0.0368132
79789	CLMN	-0.35857	0.0373047
7088	TLE1	-0.357048	0.0381779
5334	PLCL1	-0.355382	0.0391526
23039	XPO7	-0.35346	0.0403016
25843	MOBKL3	-0.353313	0.0403906
8738	CRADD	-0.352995	0.0405837
26225	ARL5A	-0.350918	0.0418636
23451	SF3B1	-0.349383	0.0428296
55313	FLJ11151	-0.348146	0.0436218
4233	MET	-0.34571	0.0452156
373	TRIM23	-0.345631	0.0452681
10150	MBNL2	-0.345547	0.0453236
57447	NDRG2	-0.345005	0.0456852
5550	PREP	-0.344966	0.0457112
10247	HRSP12	-0.344695	0.0458933
387263	C6orf120	-0.343879	0.046444
55074	OXR1	-0.342004	0.0477293
8239	USP9X	-0.341815	0.0478606
3221	HOXC6///HOXC4	-0.339154	0.0497371
3223	HOXC6///HOXC4	-0.339154	0.0497371
10628	TXNIP	-0.339032	0.049825
1580	CYP4B1	-0.338795	0.0499948
Positive Correlation with Fiber Stiffness
29902	C12orf24	0.472267	0.00480064
23621	BACE1	0.47037	0.00499689
64318	NOC3L	0.456374	0.00666967
55384	MEG3	0.44541	0.00829519
22944	KIN	0.442025	0.00886058
1374	CPT1A	0.439943	0.00922453
5379	PMS2L2///LOC730324///LOC441259///PMS2L3///LOC100132832///PMS2L5///PMS2L1///PMS2///PMS2L12	0.439823	0.00924578
11073	TOPBP1	0.435054	0.0101289
1436	CSF1R	0.420721	0.0132249
26576	SRPK3	0.416418	0.014297
25878	MXRA5	0.412541	0.0153244
7412	VCAM1	0.391422	0.0220684
9200	PTPLA	0.378411	0.0273314
2643	GCH1	0.371033	0.0307471
7380	UPK3A	0.36903	0.0317322
54552	GNL3L	0.366345	0.0330931
10946	SF3A3	0.364499	0.0340566
53838	C11orf24	0.362489	0.0351306
5791	PTPRE	0.362247	0.035262
3059	HCLS1	0.362119	0.0353313
83716	CRISPLD2	0.356344	0.0385873
3339	HSPG2	0.351989	0.0411999
27300	ZNF544	0.351428	0.0415464
5179	PENK	0.350829	0.0419189
58477	SRPRB	0.347582	0.0439866
4175	MCM6	0.345614	0.0452789
1760	DMPK	0.342058	0.047692
Negative Correlation with Fiber Stiffness
9774	BCLAF1	-0.506838	0.00222094
51174	TUBD1	-0.469841	0.00505286
8459	TPST2	-0.437493	0.00966872
55272	IMP3	-0.432392	0.0106523
1810	DR1	-0.427453	0.0116839
27309	ZNF330	-0.42265	0.0127668
9275	BCL7B	-0.419886	0.0134276
1052	CEBPD	-0.414861	0.0147025
23253	ANKRD12	-0.411295	0.0156675
2628	GATM	-0.402132	0.0183929
7329	UBE2I	-0.399858	0.0191274
8243	SMC1A	-0.393815	0.0211985
8405	SPOP	-0.392704	0.0215986
5813	PURA	-0.391653	0.0219831
51526	C20orf111	-0.389359	0.022842
1580	CYP4B1	-0.383415	0.0251968
5693	PSMB5	-0.37915	0.0270071
9550	ATP6V1G1	-0.378905	0.0271141
55188	RIC8B	-0.37688	0.028013
56985	C17orf48	-0.37234	0.0301179
57003	CCDC47	-0.371255	0.0306396
10728	PTGES3	-0.370346	0.0310822
10146	G3BP1	-0.365298	0.0336366
27107	ZBTB11	-0.365284	0.0336441
404672	GTF2H5	-0.364474	0.0340694
11251	GPR44	-0.364275	0.0341748
6641	SNTB1	-0.364268	0.0341785
4782	NFIC	-0.362608	0.0350663
9099	USP2	-0.360767	0.0360731
23583	SMUG1	-0.360187	0.0363949
93	ACVR2B	-0.359899	0.0365557
4253	CTAGE5	-0.358273	0.0374738
60561	RINT1	-0.357858	0.0377112
26505	CNNM3	-0.356039	0.0387655
55204	GOLPH3L	-0.355897	0.0388493
9604	RNF14	-0.354156	0.0398826
64795	RMND5A	-0.353581	0.0402289
64236	PDLIM2	-0.353321	0.040386
79789	CLMN	-0.352672	0.0407806
7328	UBE2H	-0.350895	0.0418782
9457	FHL5	-0.349085	0.0430196
9878	TOX4///LOC285412	-0.347576	0.0439903
285412	TOX4///LOC285412	-0.347576	0.0439903
10766	TOB2	-0.345739	0.0451963
5685	PSMA4	-0.344114	0.0462848
5709	PSMD3	-0.343679	0.0465792
55308	DDX19A///DDX19B	-0.34226	0.0475521
55671	SMEK1	-0.340279	0.0489367
5887	RAD23B///LOC131185	-0.339701	0.0493468
26993	AKAP8L	-0.338806	0.0499874
