# Supplementary material for: Transcriptional Abnormalities of Hamstring Muscle Contractures in Children with Cerebral Palsy
Source: PLoS One. 2012 Aug 16;7(8):e40686. doi: 10.1371/journal.pone.0040686 (PMC3431909; doi:10.1371/journal.pone.0040686)
Supplement: Table S5 — Primer pairs used for quantitative real-time PCR analysis. (XLSX) [file pone.0040686.s005.xlsx]

## Sheet: Sup Table 5
Gene Ontology	GO#	Category	Observed	Expected	p-value
Biological Process	Postive Bundle Stiffness Correlation
extracellular matrix organization	0030198	21	13	2.247	5.54e-06
extracellular structure organization	0043062	23	13	2.461	1.29e-05
collagen fibril organization	0030199	10	8	1.07	7.53e-05
collagen biosynthetic process	0032964	5	5	0.535	0.0014
cell adhesion	0007155	93	23	9.951	0.003
biological adhesion	0022610	93	23	9.951	0.003
skin development	0043588	6	5	0.642	0.0044
collagen metabolic process	0032963	8	5	0.856	0.0291
response to external stimulus	0009605	85	19	9.095	0.0291
blood vessel development	0001568	32	10	3.424	0.0291
regulation of response to external stimulus	0032101	13	6	1.391	0.0291
immune system process	0002376	71	17	7.597	0.0291
myeloid leukocyte mediated immunity	0002444	3	3	0.321	0.0291
response to chemical stimulus	0042221	127	25	13.589	0.0291
response to wounding	0009611	60	15	6.42	0.0291
bone morphogenesis	0060349	3	3	0.321	0.0291
multicellular organismal macromolecule metabolic process	0044259	9	5	0.963	0.0291
multicellular organismal metabolic process	0044236	9	5	0.963	0.0291
vasculature development	0001944	33	10	3.531	0.0344
cell-substrate adhesion	0031589	19	7	2.033	0.0478
cell activation	0001775	24	8	2.568	0.0478
Molecular Function
extracellular matrix structural constituent	0005201	21	12	2.247	2.58e-05
structural molecule activity	0005198	67	22	7.169	3.41e-05
platelet-derived growth factor binding	0048407	6	5	0.642	0.0027
growth factor binding	0019838	21	8	2.247	0.0256
proteoglycan binding	0043394	3	3	0.321	0.026
Cellular Component
extracellular matrix	0031012	56	23	5.992	1.65e-07
proteinaceous extracellular matrix	0005578	51	22	5.457	1.65e-07
extracellular region part	0044421	87	28	9.309	1.17e-06
extracellular region	0005576	133	35	14.231	3.46e-06
collagen	0005581	14	10	1.498	3.46e-06
extracellular matrix part	0044420	28	14	2.996	4.5e-06
fibrillar collagen	0005583	7	6	0.749	0.0002
basement membrane	0005604	18	8	1.926	0.0047
myosin complex	0016459	11	5	1.177	0.0423
cytoskeleton	0005856	140	26	14.98	0.0426
Cellular Component	Negative Bundle Stiffness Correlation
mitochondrial intermembrane space	0005758	5	4	0.36	0.0067
organelle envelope lumen	0031970	6	4	0.43	0.01
Biological Process	Negative Fiber Stiffness Correlation
ubiquitin-dependent protein catabolic process	0006511	40	7	1.34	0.0254
modification-dependent protein catabolic process	0019941	81	9	2.72	0.0318
cellular protein catabolic process	0044257	86	9	2.89	0.0318
proteolysis involved in cellular protein catabolic process	0051603	86	9	2.89	0.0318
modification-dependent macromolecule catabolic process	0043632	81	9	2.72	0.0318
mitotic cell cycle	0000278	39	6	1.31	0.0318
proteasomal protein catabolic process	0010498	18	4	0.6	0.0381
proteasomal ubiquitin-dependent protein catabolic process	0043161	18	4	0.6	0.0381
regulation of ubiquitin-protein ligase activity during mitotic cell cycle	0051439	12	3	0.4	0.0393
negative regulation of ligase activity	0051352	12	3	0.4	0.0393
regulation of ubiquitin-protein ligase activity	0051438	12	3	0.4	0.0393
positive regulation of ubiquitin-protein ligase activity	0051443	11	3	0.37	0.0393
positive regulation of ubiquitin-protein ligase activity during mitotic cell cycle	0051437	11	3	0.37	0.0393
cellular macromolecule catabolic process	0044265	115	10	3.86	0.0393
negative regulation of ubiquitin-protein ligase activity during mitotic cell cycle	0051436	12	3	0.4	0.0393
DNA metabolic process	0006259	61	7	2.05	0.0393
anaphase-promoting complex-dependent proteasomal ubiquitin-dependent protein catabolic process	0031145	12	3	0.4	0.0393
negative regulation of ubiquitin-protein ligase activity	0051444	12	3	0.4	0.0393
cellular response to DNA damage stimulus	0034984	37	5	1.24	0.0393
positive regulation of ligase activity	0051351	11	3	0.37	0.0393
Cellular Component
nucleus	0005634	448	28	16.61	0.0144
proteasome complex	0000502	13	4	0.48	0.0216
intracellular membrane-bounded organelle	0043231	694	35	25.73	0.0276
membrane-bounded organelle	0043227	694	35	25.73	0.0276
chromosome	0005694	43	6	1.59	0.0384
intracellular part	0044424	930	41	34.47	0.0426
organelle	0043226	791	37	29.32	0.0426
intracellular organelle	0043229	790	37	29.28	0.0426
chromosomal part	0044427	36	5	1.33	0.0475
