# Supplementary material for: Transcriptional Abnormalities of Hamstring Muscle Contractures in Children with Cerebral Palsy
Source: PLoS One. 2012 Aug 16;7(8):e40686. doi: 10.1371/journal.pone.0040686 (PMC3431909; doi:10.1371/journal.pone.0040686)
Supplement: Table S6 — Significantly over-represented ontologies from genes with positively or negatively significantly correlated with fiber or bundle passive stiffness. Category, Observed, Expected, and multiple testing adjusted p-value (adjP). (XLSX) [file pone.0040686.s006.xlsx]

## Sheet: Sup Table 6
Increased in Cerebral Palsy		Decreased in Cerebral Palsy
Entrez Gene	Gene Symbol	Entrez Gene	Gene Symbol
22872	SEC31A	5209	PFKFB3
120	ADD3	27095	TRAPPC3
6421	SFPQ	1052	CEBPD
4147	MATN2	4501	MT1X
5157	PDGFRL	682	BSG
10234	LRRC17	645745	MT1M/E/H/P2
1842	ECM2
8483	CILP	Gene Ontologies from Increased in Cerebral Palsy
65110	UPF3A
81578	COL21A1	Extracellular Matrix
8076	MFAP5	Proteinaceous Extracellular Matrix
91851	CHRDL1	Extracellular Region
6934	TCF7L2	Extracellular Region Part
