# Supplementary material for: Transcriptional Abnormalities of Hamstring Muscle Contractures in Children with Cerebral Palsy
Source: PLoS One. 2012 Aug 16;7(8):e40686. doi: 10.1371/journal.pone.0040686 (PMC3431909; doi:10.1371/journal.pone.0040686)
Supplement: Table S7 — Similarity between upper and lower extremity transcriptional studies of skeletal muscle in ceregbral palsy. The list of genes that are significantly regulated in the same direction with cerebral palsy between the current study in hamstring muscle and a previous study in wrist muscle. Only 13 genes were up-regulated in both and only 6 down regulated in both. The 13 up-regulated genes were significantly over-represented in the 4 extracellular matrix gene ontologies listed. (XLSX) [file pone.0040686.s007.xlsx]

## Sheet: Sup Table 7
Gene	Transcript	Base pairs	Sense Primer (5'-3')	Antisense Primer (5'-3')
COL1A2	NM_000089	225	TCCAAAGGAGAGAGCGGTAA	GCCACTTGCACCACGACTA
COL4A2	NM_001846	269	CTGGGTGGCGGAGTTTGTG	GCTGATGTGTGTGCGGATGAG
COL4A3	NM_000091	157	CACCAGCTCTGATGCCAATG	AGAGAAATCCAGCCGTGAGG
DMD	NM_004019	151	GACCAGCACAACCTCAAGCAA	TCAGCAGCCAGTTCAGACACA
FBXO32	NM_058229	376	GTCCAAAGAGTCGGCAAGT	TTGGGTAACATCGGACAAGT
GAPDH	NM_002046	172	TCTGACTTCAACAGCGACAC	TGGTCCAGGGGTCTTACTC
IGF1	NM_000618	355	AGCAGTCTTCCAACCCAATTA	CACGGACAGAGCGAGCTG
IGFBP5	NM_000599	339	CCAAACACACCCGCATCT	CAGCTTCATCCCGTACTTGTC
GDF8	NM_005259	167	TATCACGCTACAACGGAAAC	GGAGTCTCGACGGGTCTC
MYH1	NM_005963	132	AAGAGCAGGGAGGTTCACAC	TTATCTCCAAAAGTCATAAGTACA
NEB	NM_004543	131	CCGTGCCATGTATGACTATAT	CGGTCCTGCCAGTCCTCTG
PVALB	NM_002854	329	GATGACAGACTTGCTGAACGC	CTTAGCTTTCAGCCACCAGAG
TRIM63	NM_032588	393	GAGGATTCCCGTCGAGTGAC	AATGGCTCTCAGGGCGTCT
